# Supplementary material for: Sulforaphane Diminishes the Formation of Mammary Tumors in Rats Exposed to 17β-Estradiol
Source: PubMed Central journal article supplement (PMC7468750; doi:10.3390/nu12082282), 2020-07-30
Supplement: nutrients-12-02282-s001.pdf [file nutrients-12-02282-s001.pdf]

**Supplemental data (Palliyaguru et al. 2020)**

| <b>Rat primer ID</b> | <b>Forward sequence</b>  | <b>Reverse sequence</b>   |
|----------------------|--------------------------|---------------------------|
| Nqo1                 | GCCATGAAGGAGGCTGCTGT     | ATCACCAGGTCTGCAGCTTC      |
| Ucp1                 | GTGAAGGTCAGAATGCAAGC     | AGGGCCCCCTTCATGAGGTC      |
| Fasn                 | GGATGTCAACAAGCCCAAGT     | CAGAGGAGAAGGCCACAAAG      |
| Scd1                 | TGTTTCGTCAGCACCTTCTTG    | TCTTGTCGTAGGGGCGATAC      |
| Pgc1 $\alpha$        | TGTGCAGCCAAGACTCTGTAT    | TATGTTTCGCGGGCTCATTGT     |
| Gapdh                | GGCACAGTCAAGGCTGAGAATG   | ATGGTGGTGAAGACGCCAGTA     |
| Hdac1                | TCACCGAATCCGAATGACTCATAA | CTGGGCGAATAGAACGCAAGA     |
| Dnmt1                | GCTAAGGACGATGATGAGACG    | CTTTTTGGGTGACGGCAACTC     |
| Ape1                 | TCAGAAAACGTCAGCCAGTG     | CGGGAGTTTGTCTCTGAGC       |
| Ogg1                 | CTAAGAAGACAGAAGGCTAGGTAG | CTAAGAAGACAGAAGGCTAGGTAG  |
| Nrf2                 | CACATCCAGACAGACACCAGT    | CTACAAATGGGAATGTCTCTGC    |
| Keap1                | GGACGGCAACACTGATTC       | TCGTCTCGATCTGGCTCATA      |
| Ppar $\gamma$        | CAGCCACCATCAACGCAAGT     | TTACAGCTCAGTTGAACGCCTTTTG |
| Pcna                 | ACTTGGGAATCCCAGAACAGG    | CACAGCATCTCCAATATGGC      |
| Erc1                 | AAGGCGTATGAGCAGAAGC      | TCCAAATGTAGTGAGGAGGGT     |
| Xpc                  | CAGCCTTTGCCACCTCCA       | TCCACGACAATACCCAAGGAC     |
| Xpa                  | AAGAAGAACCCTCGCCATTCA    | TTCAAGAGCCCGCTTTACAAC     |

**Supplemental Table S1.** Realtime PCR primer sequences

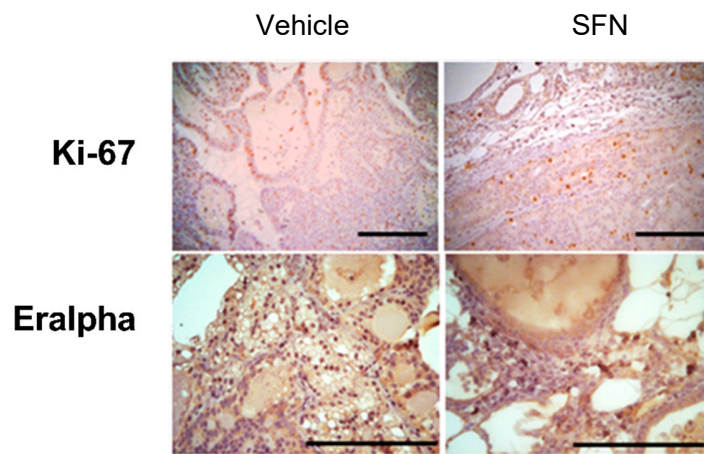

**Supplemental Figure S1.** Representative images of expression of Ki-67 and ER $\alpha$  in mammary tumors. Images present n=3 per group. Scale bar = 50  $\mu$ m.

CONFIDENTIAL

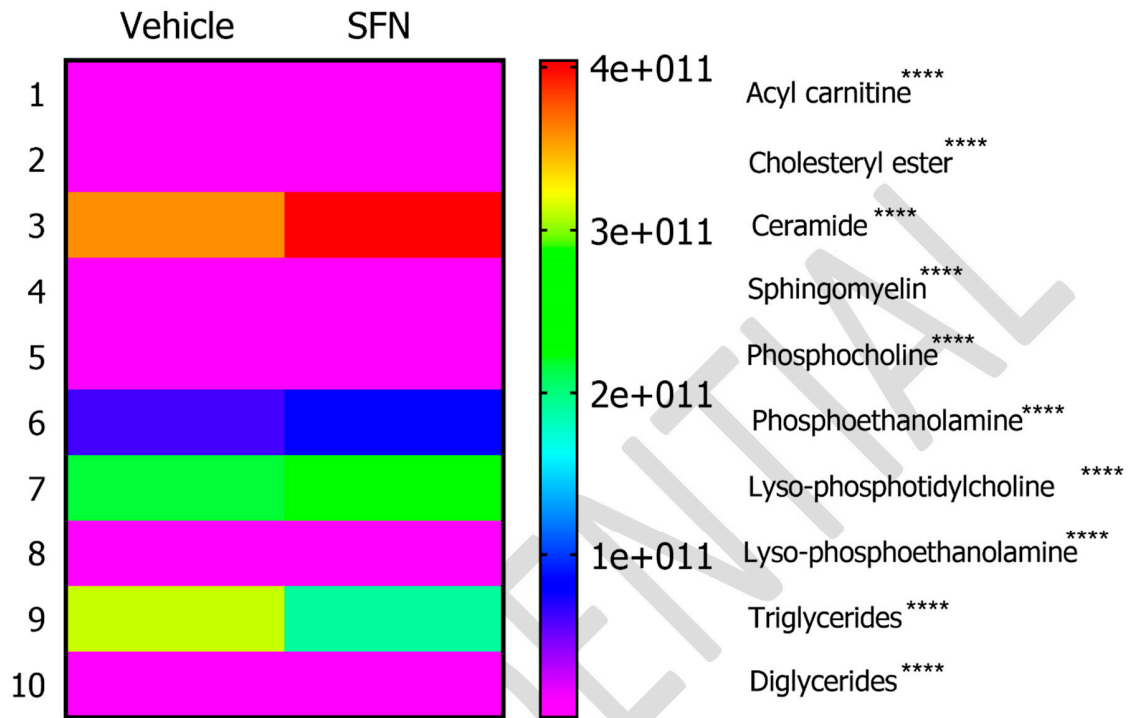

**Supplemental Figure S2.** Untargeted lipidomics on serum collected from E2-implanted rats that were either gavaged with Vehicle (DMSO) or SFN. All samples included for this analysis were collected after the active DMSO/SFN gavage period and includes both mammary tumor-bearing and non-bearing rats. Values are mean  $\pm$  SEM (n=8 per group). \*\*\*\*p<0.0001 (Student's t-test) compared to DMSO.

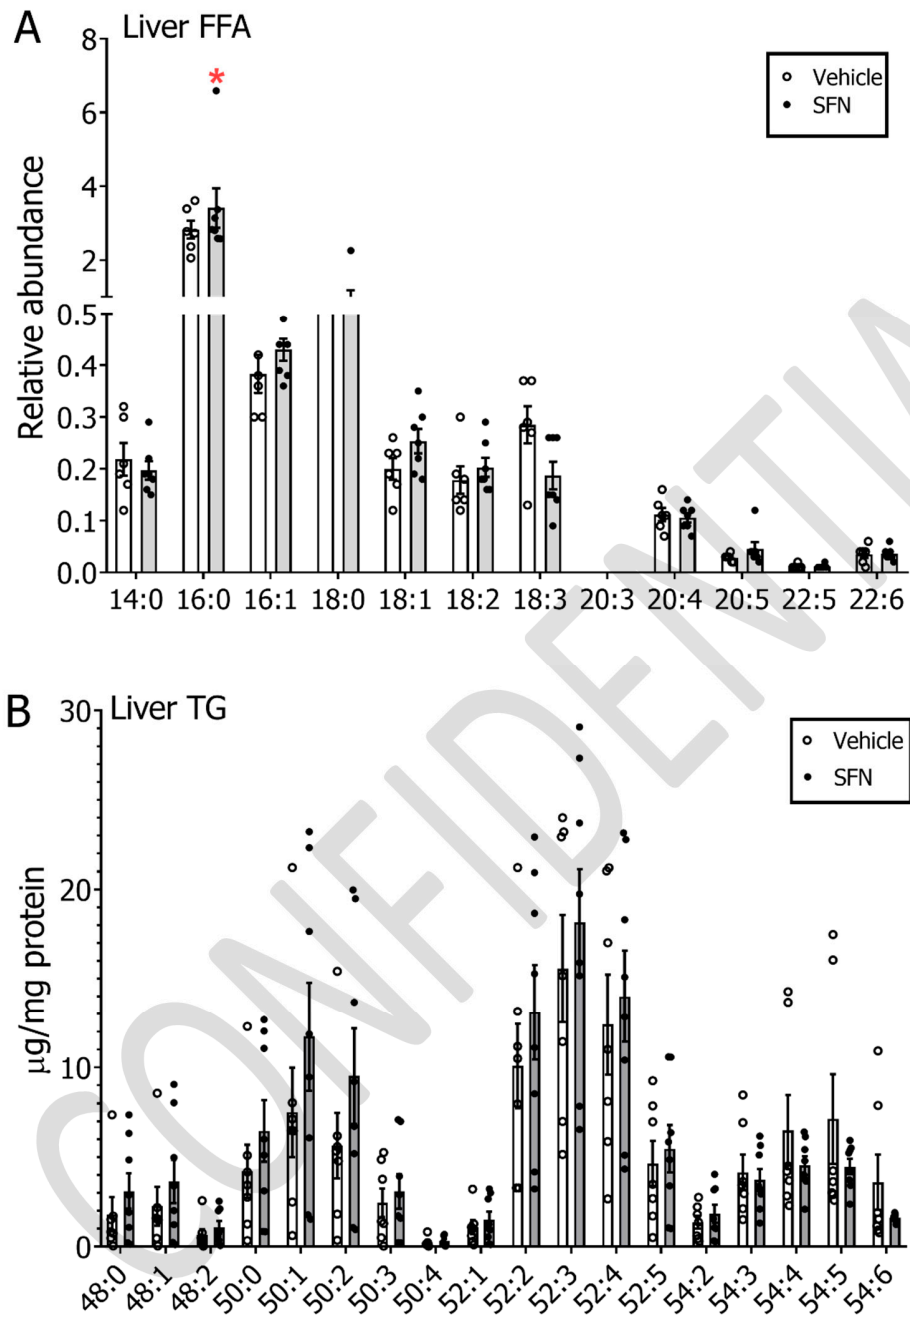

**Supplemental Figure S3. A)** Free fatty acid (FFA) and **B)** triglyceride (TG) quantification of livers from E2-treated rats that were gavaged with Vehicle (DMSO) or SFN. All samples included for this analysis were collected after the active DMSO/SFN gavage period and includes both mammary tumor-bearing and non-bearing rats. Values are mean  $\pm$  SEM (n=12 in DMSO group and n=9 in SFN group). \*p<0.05 (Student's t-test).

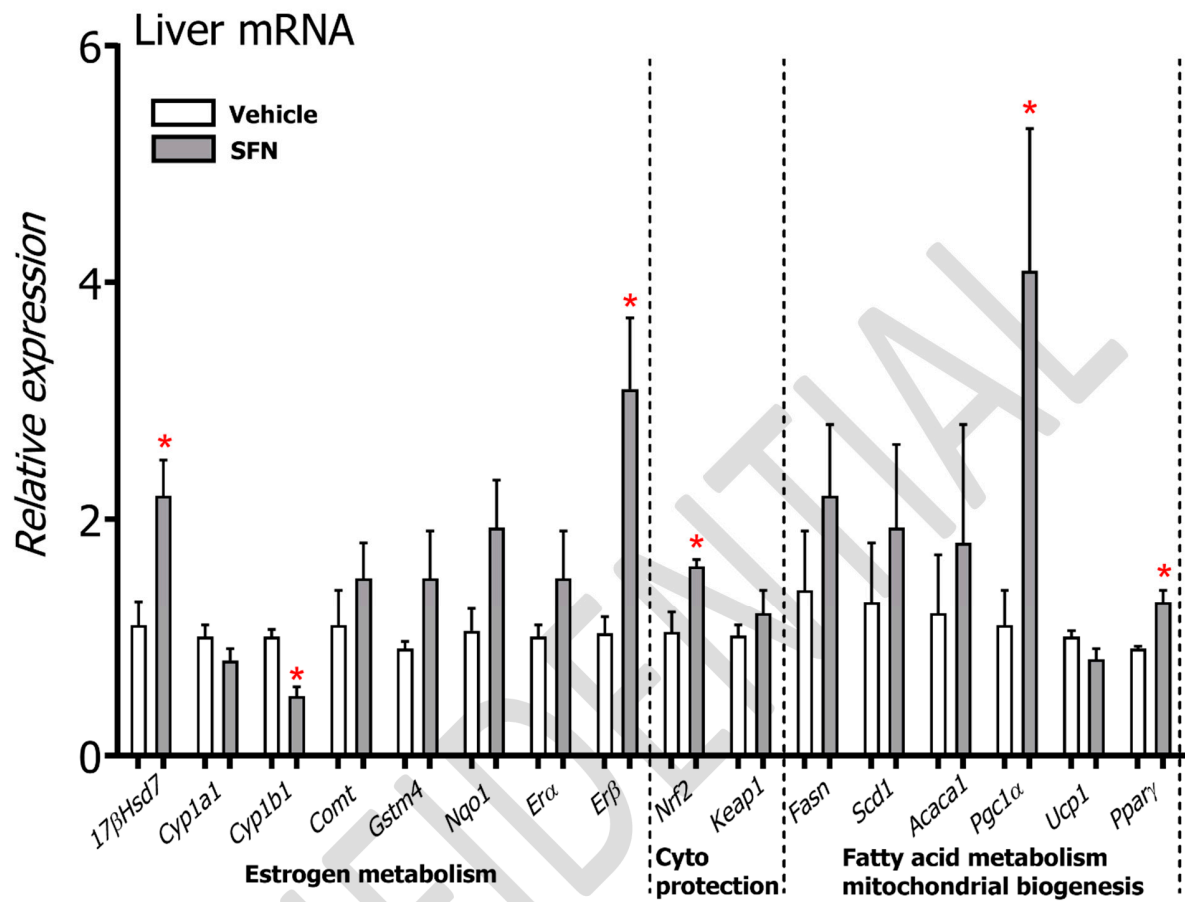

**Supplemental Figure S4.** mRNA expression profile in liver tissue between Vehicle (DMSO) and SFN-treated rats. All samples included for this analysis were collected after the active DMSO/SFN gavage period. *Gapdh* used as housekeeping control. Values are mean  $\pm$  SEM (n=7 in DMSO group and n=3 in SFN group). \*p<0.05 (Student's t-test).
